# Supplementary material for: Population pharmacokinetic models of anti-PD-1 mAbs in patients with multiple tumor types: A systematic review
Source: PubMed Central journal article supplement (PMC9379304; doi:10.3389/fimmu.2022.871372), 2022-08-02
Supplement: DataSheet_1.pdf [file DataSheet_1.pdf]

## Supplementary materials

**Supplementary Figure 1.** The percentage of explained and unexplained CL(A) and  $V_C$ (B) variability in the base and final models for nivolumab, pembrolizumab, dostarlimab and camrelizumab.

**Supplementary Figure 2.** The effects of included covariates on CL of (A) pembrolizumab, (B) dostarlimab, (C) cemiplimab and (D) camrelizumab.

**Supplementary Table 1.** The effects of included covariates on  $V_C$  of nivolumab, pembrolizumab, dostarlimab and cemiplimab.

**A. IIV on CL**

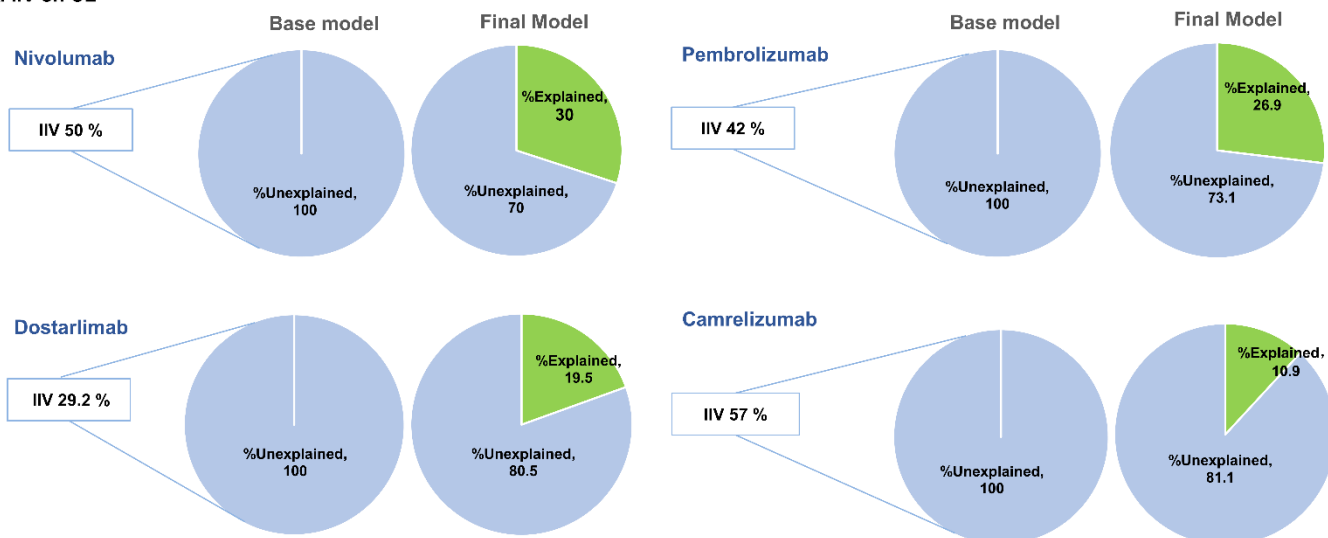

**B. IIV on Vc**

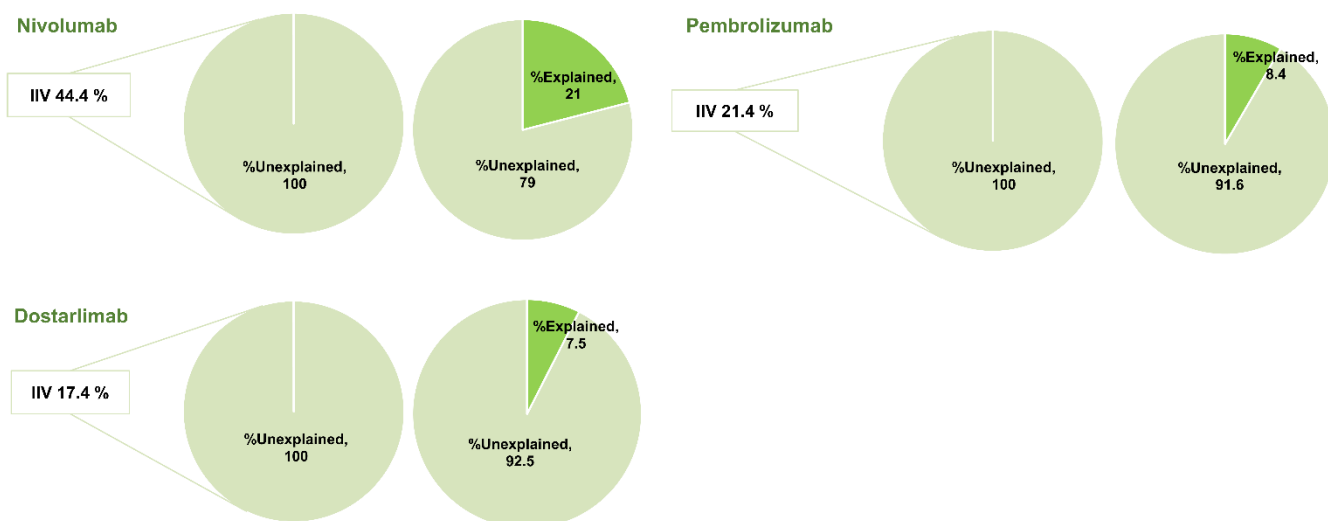

**Supplementary Figure 1. The percentage of explained and unexplained CL(A) and V<sub>C</sub>(B) variability in the base and final models for nivolumab, pembrolizumab, dostarlimab and camrelizumab.** *The covariates included in the final model can minimize the interindividual variability in the base model. The figure shows that four anti-PD-1 mAbs' final model reduced the percentage of unexplainable variation by including CL and V<sub>C</sub> covariates. As the covariates affecting cemiplimab V<sub>C</sub> were not included in the final model, the figure of interindividual variability of cemiplimab V<sub>C</sub> was not presented. IIV interindividual variability, CL clearance, V<sub>C</sub> central volume of distribution*

Effect on Pembrolizumab CL

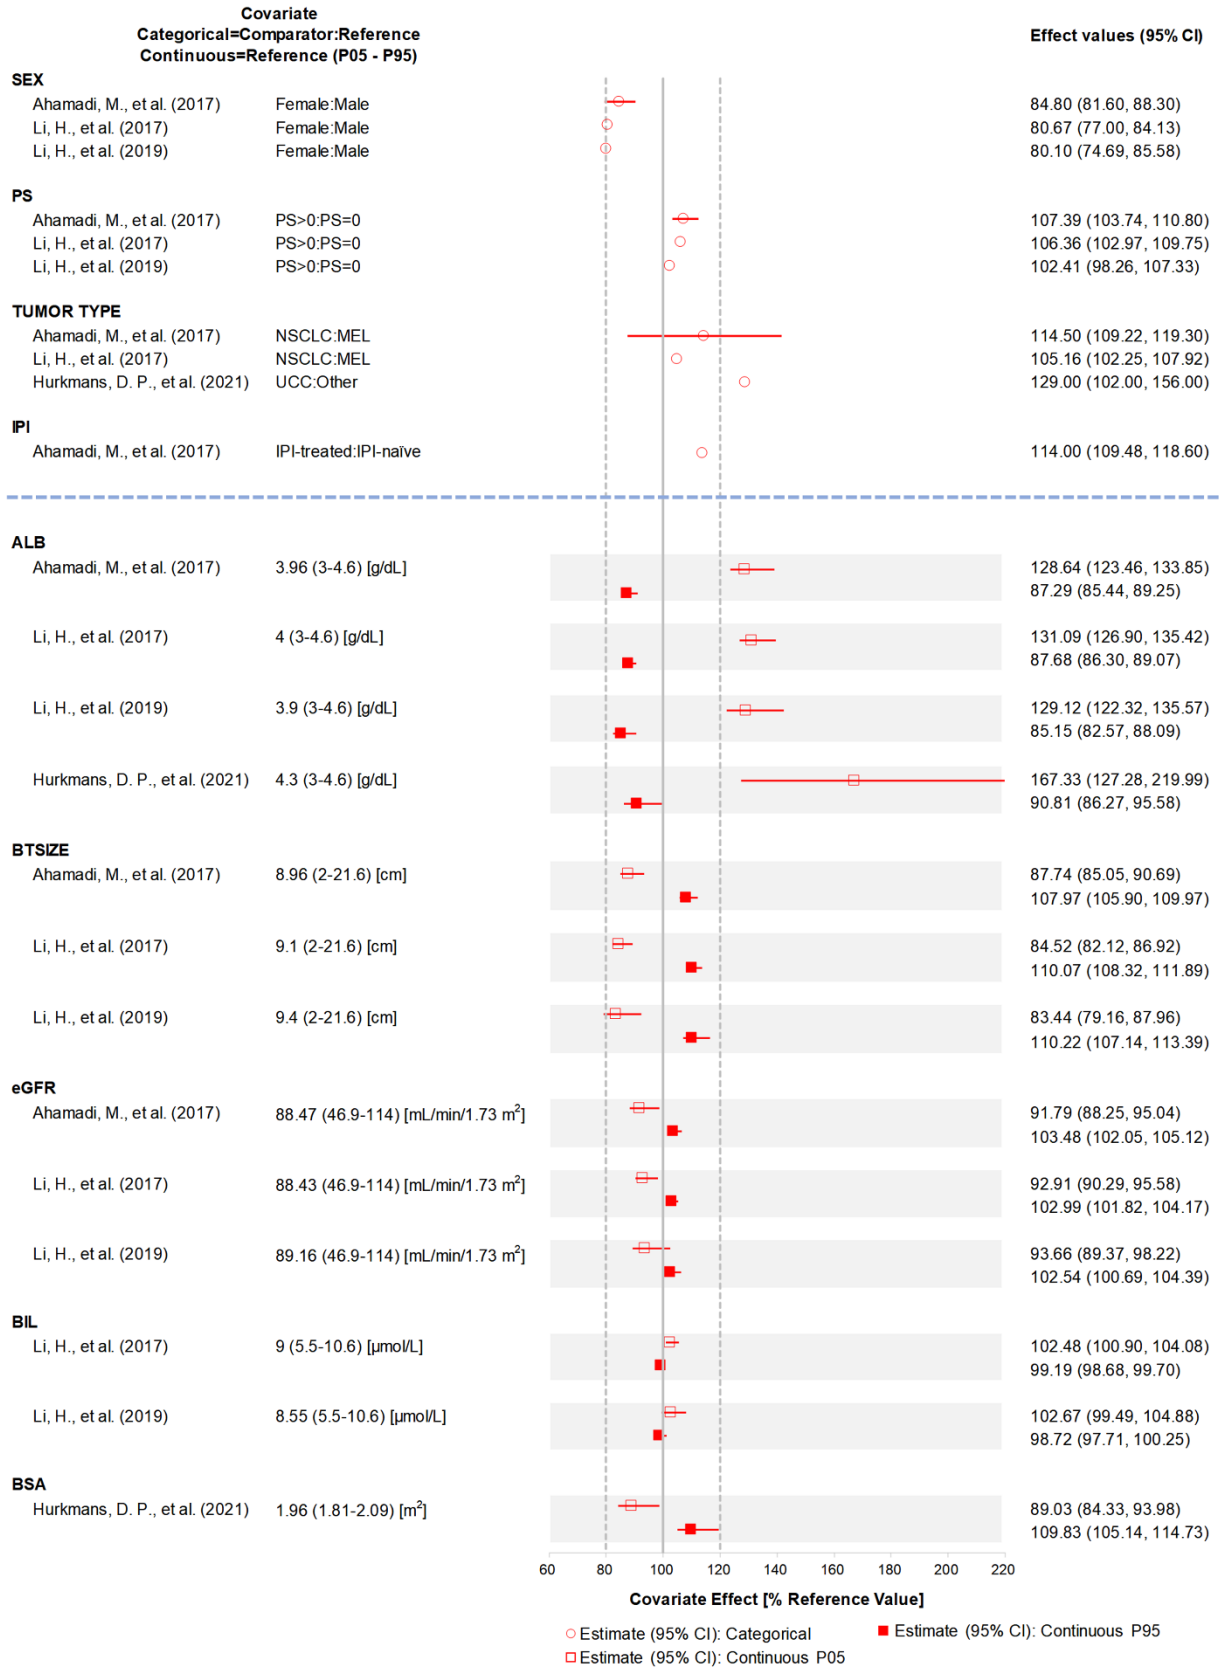

**B**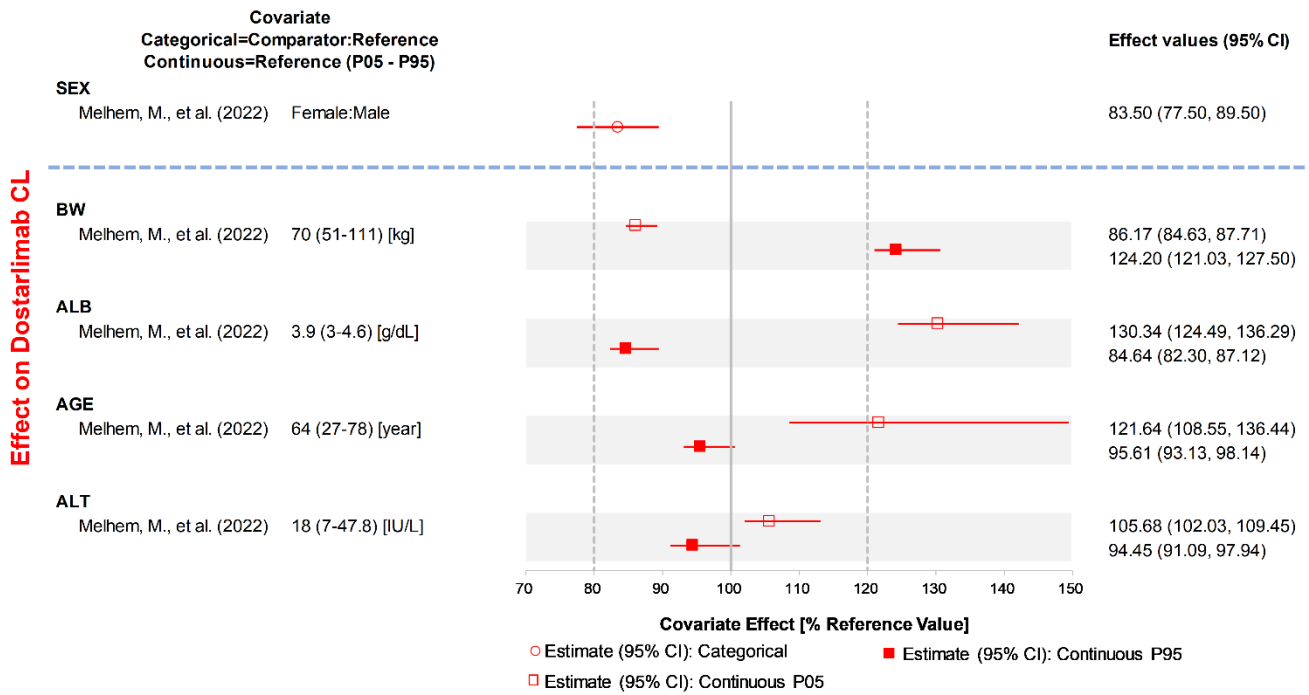**C**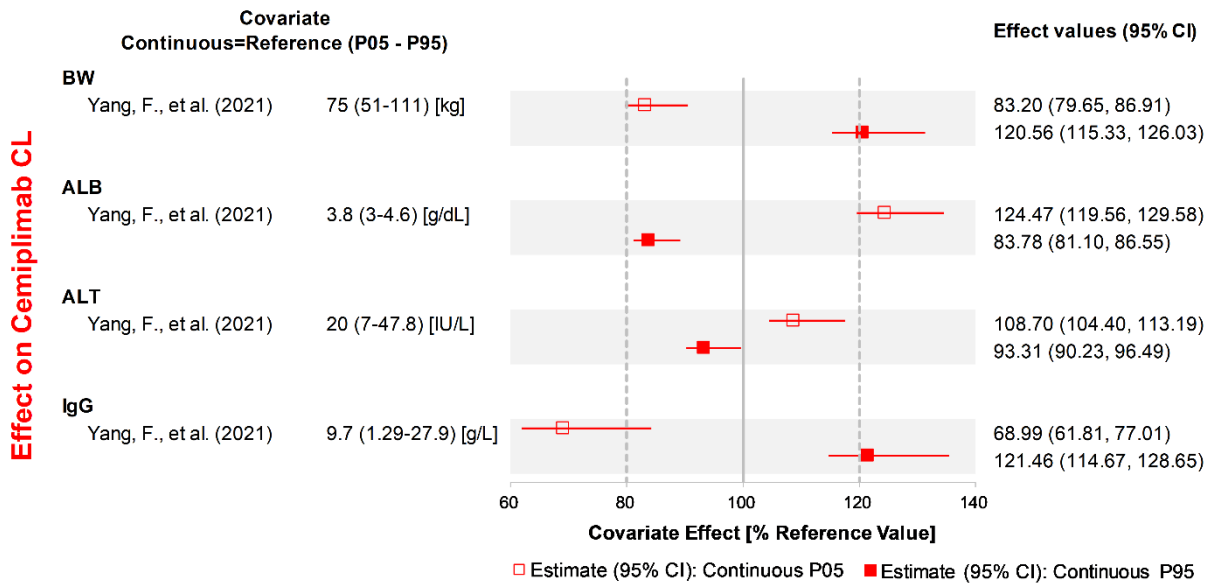**D**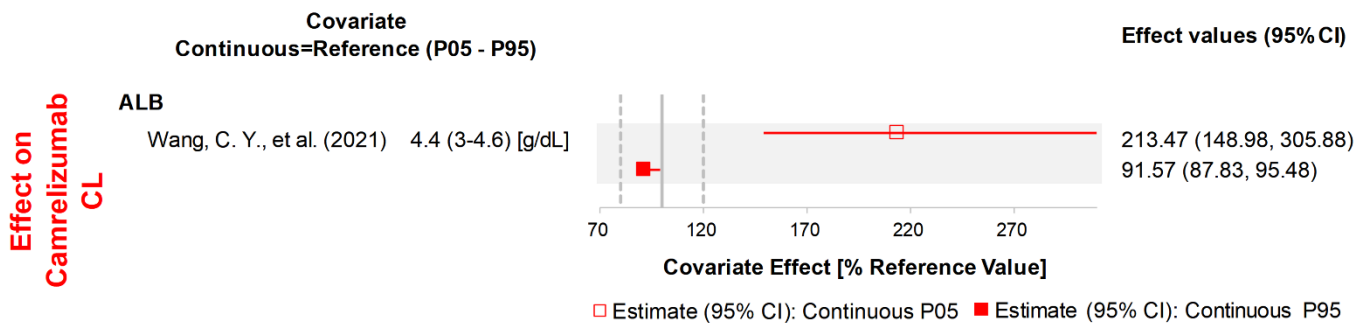

**Supplementary Figure 2. The effects of included covariates on CL of (A) pembrolizumab, (B) dostarlimab, (C) cemiplimab and (D) camrelizumab.** *Categorical covariate effects (95% confidence interval [CI]) are represented by open symbols (horizontal lines). Continuous covariate effects (95% CI) at the 5th/95th percentiles of the covariate are represented by the end of horizontal boxes (horizontal lines). The typical value of clearance in each study was considered to be 1. The effect of each covariate for clearance is displayed by the ratio of clearance in the range of each covariate to the typical clearance value. PS performance status, IPI ipilimumab prior treatment status: naïve or treated, BTSIZE baseline tumor size described by the sum of long diameters of target tumor lesions, eGFR estimated glomerular filtration rate, BIL bilirubin, BSA body surface area, ALB albumin, ALT alanine aminotransferase, BW body weight, IgG immunoglobulin G, P05 5th percentile, P95 95th percentile*

**Supplementary Table 1. The effects of included covariates on V<sub>C</sub> of nivolumab, pembrolizumab, dostarlimab and cemiplimab.**

| anti-PD-1 mAbs | Continuous covariate | Reference                             | Reference value (P05-P95) | Estimate (95%CI): P05   | Estimate (95%CI): P95   | Categorical covariate | Reference                             | Comparator: Reference   | Estimate (95%CI)       |
|----------------|----------------------|---------------------------------------|---------------------------|-------------------------|-------------------------|-----------------------|---------------------------------------|-------------------------|------------------------|
| Nivolumab      | BW                   | Bajaj, G., et al. (2017)              | 80 (51-111) [kg]          | 76.43 (73.6, 79.34)     | 121.59 (118.33, 124.99) | SEX                   | Bajaj, G., et al. (2017)              | Female: Male            | 85.9 (81.87, 89.58)    |
|                |                      | Hamuro, L., et al. (2019)             | 80 (51-111) [kg]          | 78.07 (74.66, 81.62)    | 119.74 (115.92, 123.68) |                       | Hamuro, L., et al. (2019)             | Female: Male            | 85.81 (81.79, 90.03)   |
|                |                      | Osawa, M., et al. (2019)              | 80 (51-111) [kg]          | 82.47 (79.59, 85.38)    | 115.05 (112.18, 118.06) |                       | Osawa, M., et al. (2019)              | Female: Male            | 82.78 (78.66, 86.85)   |
|                |                      | Wang, X., et al. (2019)               | 80 (51-111) [kg]          | 75.82 (72.9, 78.85)     | 122.31 (118.87, 125.85) |                       | Wang, X., et al. (2019)               | Female: Male            | 90.3 (86.18, 94.63)    |
|                |                      | Zhang, J., et al. (2019) <sup>a</sup> | 80 (51-111) [kg]          | 71.67 (68.54, 74.9)     | 127.42 (123.4, 131.62)  |                       | Zhang, J., et al. (2019) <sup>a</sup> | Female: Male            | 87.63 (82.94, 92.24)   |
|                |                      | Zhang, J., et al. (2019) <sup>b</sup> | 80 (51-111) [kg]          | 78.63 (77.05, 80.24)    | 119.11 (117.37, 120.88) |                       | Zhang, J., et al. (2019) <sup>b</sup> | Female: Male            | 85.13 (82.78, 87.63)   |
|                |                      |                                       |                           |                         |                         |                       | TUMOR TYPE                            | Wang, X., et al. (2019) | SQ+NSQ: Other          |
| Pembrolizumab  | ALB                  | Ahamadi, M., et al. (2017)            | 3.96 (3-4.6) [(g/dL)]     | 105.94 (103.16, 108.81) | 96.93 (95.55, 98.34)    | SEX                   | Ahamadi, M., et al. (2017)            | Female: Male            | 86.6 (84.2, 89.1)      |
|                |                      | Li, H., et al. (2017)                 | 4 (3-4.6) [(g/dL)]        | 106.72 (104.26, 109.24) | 96.89 (95.8, 97.99)     |                       | Li, H., et al. (2017)                 | Female: Male            | 85.32 (82.54, 87.98)   |
|                |                      | Li, H., et al. (2019)                 | 3.9 (3-4.6) [(g/dL)]      | 107.28 (104.23, 110.48) | 95.67 (93.92, 97.43)    |                       | Li, H., et al. (2019)                 | Female: Male            | 84.26 (80.24, 88.64)   |
|                | LDH                  | Hurkmans, D. P., et al. (2021)        | 238(190-316) [(IU/L)]     | 92.63 (89.75, 95.6)     | 110.12 (105.83, 114.58) | IPI                   | Ahamadi, M., et al. (2017)            | IPI-treated: IPI-naïve  | 107.36 (104.16, 110.6) |
|                |                      |                                       |                           |                         |                         | TUMOR TYPE            | Hurkmans, D. P., et al. (2021)        | Meso: other             | 58 (32, 84)            |
| Dostarlimab    | BW                   | Melhem, M., et al. (2022)             | 70 (51- 111) [kg]         | 87.57 (86.36, 88.77)    | 121.31 (118.93, 123.8)  | SEX                   | Melhem, M., et al. (2022)             | Female: Male            | 83.8 (79.8, 87.8)      |

|            |     |                           |                                      |                         |                         |
|------------|-----|---------------------------|--------------------------------------|-------------------------|-------------------------|
| Cemiplimab | ALB | Melhem, M., et al. (2022) | 3.9 (3- 4.6) [g/dL]                  | 104.1 (101.22, 107.09)  | 97.51 (95.78, 99.24)    |
|            | BW  | Yang, F., et al. (2021)   | 75 (51- 111) [kg]                    | 68.79 (64.9, 72.92)     | 146.27 (137.86, 155.19) |
|            | BMI | Yang, F., et al. (2021)   | 26.5(14.8-56.3) [kg/m <sup>2</sup> ] | 138.57 (125.66, 152.81) | 65.57 (57.78, 74.42)    |

---

*V<sub>C</sub> central volume of distribution, P05 5th percentile, P95 95th percentile, 95% CI 95% confidence interval, BW body weight, ALB albumin, LDH lactate dehydrogenase, IPI ipilimumab treatment status: naive or treated, BMI body mass index, <sup>a</sup> reference [31], <sup>b</sup> reference [32]*
